# Supplementary material
Source: PubMed Central journal article supplement (PMC6199651)
Supplement: ba020156-suppl1.pdf [file ba020156-suppl1.pdf]

## Supplemental Data

### Supplemental Methods

#### Zebrafish husbandry and experimentation.

Zebrafish were kept at 28.5°C as described in the zebrafish book<sup>1</sup>. Genetically altered zebrafish are listed in Table S1. Embryos older than 30 hpf that were meant to be used in WISH experiments were treated with N-phenylthiourea from about 20 hpf (see Table S2 for chemicals). All procedures on animals were performed by licensed staff under the authority of the UK Home Office project licenses 40/3457, 40/3708, 30/3356 and 30/3378.

**Table S1: Zebrafish lines used in this study.**

| Name of line                      | Abbreviation   | Reference       |
|-----------------------------------|----------------|-----------------|
| <i>gfi1aa</i> <sup>qmc551Gt</sup> | <i>qmc551</i>  | 2               |
| <i>gfi1aa</i> <sup>sa11633</sup>  | <i>sa11633</i> | 3               |
| <i>gfi1b</i> <sup>sh339</sup>     | <i>sh339</i>   | this manuscript |
| <i>gfi1b</i> <sup>qmc554</sup>    | <i>qmc554</i>  | this manuscript |

**Table S2: Information on enzymes and selected chemicals**

| Chemical/Inhibitor                          | Company               | Cat. No.       | Instructions                                                                                                                                            |
|---------------------------------------------|-----------------------|----------------|---------------------------------------------------------------------------------------------------------------------------------------------------------|
| Dulbecco's phosphate buffered saline (DPBS) | Invitrogen (GIBCO)    | 14200-067      | Dilute 10x stock to 1x working solution                                                                                                                 |
| Hanks' buffered salt solution (HBSS)        | Invitrogen (GIBCO)    | 14065          | Dilute 10x stock to 1x working solution                                                                                                                 |
| Liberase Blendzyme                          | Sigma-Aldrich (Roche) | 05 401 020 001 | Dilute 50 mg in 1.86 mL distilled H <sub>2</sub> O. Make 160 µL aliquots of stock solution. Mix one aliquot with 2 mL HBSS to generate working solution |
| MS222                                       | Sigma-Aldrich         | A5040          | Stock at 4 g/l H <sub>2</sub> O, pH7.5; use at 130 µg/ml                                                                                                |
| N-Phenylthiourea                            | Sigma-Aldrich         | P7629          | Stock at 0.3g/l H <sub>2</sub> O, use at 0.03 g/l                                                                                                       |
| Giemsa                                      | BDH                   | 350864X        | Use 1:20 diluted                                                                                                                                        |

|                            |                  |       |                                                         |
|----------------------------|------------------|-------|---------------------------------------------------------|
| DPX Mountant for Histology | Fluka BioChemika | 44581 | Apply directly to dried slide and put cover slip on top |
|----------------------------|------------------|-------|---------------------------------------------------------|

### RNA isolation from FAC-sorted embryonic cells

Heterozygous and homozygous *qmc551* embryos were collected from crosses of *qmc551* homozygous females to *wt* males and to homozygous *qmc551* males, respectively. Half of the embryos of each batch were injected with 0.5 ng of two *gfi1b* morpholinos and 0.5 ng of *p53* morpholino as described previously<sup>2</sup>. Morpholino sequences are provided in Table S3. All embryos were grown to the 20 hpf. Embryos were dechorionated using a pronase solution (2.5 mg/mL). Embryos were washed first in E3 buffer and then in 1x Hanks' Balanced Salt Solution (10x HBSS buffer; Gibco, 14065 distributed by Invitrogen). Two hundred embryos were dissociated in 500  $\mu$ L of a Liberase Blendzyme solution at 33°C. Embryos were pipetted up and down with a P200 pipette every 10 min for a total of about 40 to 60 min until all yolk cells were detached and the embryos were dissociated. The cell suspensions were moved onto ice. Cells were filtered through a 40  $\mu$ m pore nylon filter (Falcon, 352340, distributed by VWR) into 50 mL conical centrifuge tubes. Cells were pelleted at 1,500 rpm (~400g) at 4 °C for 5 min in a Heraeus Multifuge 3 S-R. The supernatant was removed and then replaced with 10 mL sort buffer (1x Dulbecco's phosphate buffered saline, 2% foetal calf serum, 25 mM Hepes and 5 mM EDTA). Cells were filtered and pelleted again (as above), before being resuspended in 200  $\mu$ L of sort buffer. Cells were analyzed on a Beckman Coulter MoFlo Astrios with a 488 nm laser. Fluorescence was detected through a 529/28 nm band pass filter. For gating purposes, wildtype cells were isolated from embryos that were derived from an outcross of a heterozygous *qmc551* female to a *wt* male. Wildtype embryos in the batch showed maternal GFP expression similar to the experimental embryos. Gating these cells allowed the exclusion of cells with only maternal GFP fluorescence. Cells from all samples were sorted three consecutive times, with the second sort always reaching a purity of at least 80%. Three batches of between 1,700 and 4,000 cells were collected in 100  $\mu$ L of sort buffer for each experiment. Cells were pelleted and the supernatant decanted. Cells were lysed in 300  $\mu$ L RLT Plus buffer with  $\beta$ -mercaptoethanol (10  $\mu$ L per 1 mL of RLT Plus buffer

provided with the RNeasy Plus Micro Kit (Qiagen, 74034)). Genomic DNA was removed on gDNA eliminator columns and the RNA was cleaned up on RNeasy minElute spin columns following the manufacturer's instructions. RNA was eluted with 14  $\mu$ L of RNase-free H<sub>2</sub>O. RNA QC was done using Agilent RNA 6000 Pico kit (Agilent Biotechnologies, 5067-1513). Between 2.7 and 10.5 ng of total RNA was obtained from 1,700 to 4,000 cells. All RNAs achieved RIN numbers of 8 and higher.

**Table S3: Morpholinos.**

| Experiment                              | Oligo Name     | Sequence Reference                     |
|-----------------------------------------|----------------|----------------------------------------|
| <i>gfi1b</i> exon 4 splice morpholino 1 | MO1            | 5' -TCTGATGGAGGTATGATGGAAACAT-3'<br>2  |
| <i>gfi1b</i> exon 4 splice morpholino 2 | MO2            | 5'-GCTGTGTTCACTATCTGACCTTGTC-3'<br>2   |
| <i>p53</i> ATG morpholino               | p53 MO         | 5'-GCGCCATTGCTTTGCAAGAATTG-3'<br>4     |
| <i>etv2</i> 5'UTR morpholino            | <i>etv2</i> MO | 5'-CACTGAGTCCTTATTTCACTATATC-3'<br>5,6 |

## RNA sequencing and Bioinformatics

1.9 ng of total RNA was used to generate and amplify full length cDNA of polyadenylated transcripts for sequencing using SMART-Seq v4 Ultra Low Input RNA Kit for Sequencing (Takara, 634889). Sequencing libraries were prepared from full length cDNA using Nextera XT library preparation kit (Illumina, FC-131-1096, FC-131-1002). Library QC was performed using Agilent DNA High Sensitivity kit (Agilent biotechnologies, 5067-4626). Sequencing library concentrations were determined through qPCR (Kapa Biosystems, KK4824). Sequencing was done on an equimolar library pool using Illumina NextSeq500 sequencing platform using 2x75bp V2 chemistry according to manufacturers' guidelines (Illumina, FC-404-2002).

Raw reads were trimmed to remove adaptor and low quality sequences using Scythe (<https://github.com/vsbuffalo/scythe>) and Sickle (<https://github.com/najoshi/sickle>), respectively. The trimmed reads are available from ENA under accession number PRJEB25583. These reads were filtered to remove tRNA and rRNA sequences. Filtered reads were subsequently mapped onto

the zv9 reference genome using the TopHat mapping tool (<https://ccb.jhu.edu/software/tophat/index.shtml>). Information on the number of trimmed, filtered and mapped sequence reads for each sample is provided in Table S4. The read alignments were recorded in BAM formatted alignment files. Companion BAM index files were generated. Bam files were visualized with the Integrative Genomics Viewer (IGV, (<http://software.broadinstitute.org/software/igv/>)) and with SeqMonk (<https://www.bioinformatics.babraham.ac.uk/projects/seqmonk/>). Read counts for each gene were calculated using 'htseq-count' ([http://htseq.readthedocs.io/en/release\\_0.9.0/](http://htseq.readthedocs.io/en/release_0.9.0/)). Only uniquely and correctly aligned reads were used to generate counts per gene. Read counts were normalized against the length of every gene's exon model and against the total number of mapped reads. Normalized values are provided as RPKM (reads per kilobase of exon model per million reads)<sup>7</sup>. GraphPad Prism was used for standard statistics applications. Advanced count-based statistics was performed using the DE-Seq method<sup>8</sup> to produce the MA plots shown in Fig. 2D and 2M. Endothelial and erythroid genes highlighted in the MA plot shown in Fig. 2M are listed in Table S5.

**Table S4: Information on the number of trimmed, filtered and mapped sequence reads.** Sequence reads were trimmed and filtered using Scythe and Sickle software. Filtered reads were mapped using TopHat software. The table summarizes the number of trimmed, filtered and mapped sequence reads derived from the DNA libraries generated on full-length cDNA reverse transcribed on polyadenylated RNA isolated from 20 somite stage GFP+ cells isolated from heterozygous *qmc551* embryos, *gfi1b* morpholino-injected heterozygous *qmc551* embryos, homozygous *qmc551* embryos and *gfi1b*-morpholino-injected homozygous *qmc551* embryos.

| Sample | TrimmedReads | FilteredReads | MappedReads |            | Uniquely and Correctly Mapped Reads |            |
|--------|--------------|---------------|-------------|------------|-------------------------------------|------------|
|        |              |               | Count       | Percentage | Count                               | Percentage |
| Het1   | 88,466,580   | 85,422,004    | 74,118,229  | 86.77%     | 63,089,028                          | 73.86%     |
| Het2   | 79,519,376   | 76,739,726    | 66,777,069  | 87.02%     | 56,862,346                          | 74.10%     |
| Het3   | 84,780,446   | 82,037,832    | 71,404,026  | 87.04%     | 60,918,890                          | 74.26%     |
| HetMO1 | 82,671,702   | 80,214,178    | 70,009,095  | 87.28%     | 60,507,330                          | 75.43%     |
| HetMO2 | 79,036,454   | 76,463,384    | 66,820,002  | 87.39%     | 57,619,748                          | 75.36%     |
| HetMO3 | 83,182,998   | 80,506,118    | 70,104,145  | 87.08%     | 60,556,414                          | 75.22%     |
| Hom1   | 89,726,254   | 86,187,382    | 74,900,243  | 86.90%     | 65,229,184                          | 75.68%     |
| Hom2   | 77,274,014   | 74,249,960    | 64,468,007  | 86.83%     | 56,124,066                          | 75.59%     |
| Hom3   | 90,140,318   | 86,328,686    | 74,598,523  | 86.41%     | 64,662,084                          | 74.90%     |
| HomMO1 | 86,129,542   | 83,492,948    | 72,639,859  | 87.00%     | 63,169,918                          | 75.66%     |
| HomMO2 | 77,721,362   | 75,455,238    | 65,523,086  | 86.84%     | 57,007,298                          | 75.55%     |
| HomMO3 | 76,777,196   | 74,078,006    | 64,541,722  | 87.13%     | 56,302,842                          | 76.00%     |

**Table S5: List of endothelial (green) and erythroid (red) genes highlighted in the MA plot shown in Fig. 2M of the main manuscript**

| Endothelial Genes                                  | Chr | Start    | End      |
|----------------------------------------------------|-----|----------|----------|
| smox-001 Chr1:42236840-42248137 FOR (11.2 kbp)     | 1   | 42236840 | 42248137 |
| ap1s3b-201 Chr2:47710480-47724793 REV (14.3 kbp)   | 2   | 47710480 | 47724793 |
| ramp2-201 Chr3:36832716-36841242 REV (8.5 kbp)     | 3   | 36832716 | 36841242 |
| notch3-201 Chr3:54168014-54197194 REV (29.1 kbp)   | 3   | 54168014 | 54197194 |
| stab2-001 Chr4:9786418-9827747 FOR (41.3 kbp)      | 4   | 9786418  | 9827747  |
| tek-201 Chr5:840269-863799 FOR (23.5 kbp)          | 5   | 840269   | 863799   |
| agtr2-001 Chr5:24916909-24917991 FOR (1 kbp)       | 5   | 24916909 | 24917991 |
| dab2-001 Chr5:33963456-33972240 REV (8.7 kbp)      | 5   | 33963456 | 33972240 |
| notch1b-001 Chr5:68668507-68771307 REV (102.8 kbp) | 5   | 68668507 | 68771307 |
| ephb4a-201 Chr5:70801978-70856493 FOR (54.5 kbp)   | 5   | 70801978 | 70856493 |
| tie1-001 Chr6:33682045-33706271 REV (24.2 kbp)     | 6   | 33682045 | 33706271 |

|                                                   |    |          |          |
|---------------------------------------------------|----|----------|----------|
| cdh5-202 Chr7:45444316-45455076 FOR (10.7 kbp)    | 7  | 45444316 | 45455076 |
| mrc1a-201 Chr7:65408686-65468212 REV (59.5 kbp)   | 7  | 65408686 | 65468212 |
| plk2b-001 Chr8:17598123-17605185 FOR (7 kbp)      | 8  | 17598123 | 17605185 |
| efnb2a-001 Chr9:27137159-27157051 FOR (19.8 kbp)  | 9  | 27137159 | 27157051 |
| erg-201 Chr10:117107-122303 FOR (5.1 kbp)         | 10 | 117107   | 122303   |
| tmem88a-001 Chr10:22976133-22979486 FOR (3.3 kbp) | 10 | 22976133 | 22979486 |
| cldn5b-001 Chr10:45496701-45497363 FOR (663 bp)   | 10 | 45496701 | 45497363 |
| egfl7-201 Chr11:38486348-38507545 FOR (21.1 kbp)  | 11 | 38486348 | 38507545 |
| aqp8a.1-001 Chr12:21718815-21725518 REV (6.7 kbp) | 12 | 21718815 | 21725518 |
| flt4-001 Chr14:19717288-19856559 REV (139.2 kbp)  | 14 | 19717288 | 19856559 |
| kdr1-201 Chr14:33840326-33899405 REV (59 kbp)     | 14 | 33840326 | 33899405 |
| ldb2a-001 Chr14:49620323-49768406 REV (148 kbp)   | 14 | 49620323 | 49768406 |
| mcamb-001 Chr15:22627036-22696183 REV (69.1 kbp)  | 15 | 22627036 | 22696183 |
| sesn3-201 Chr15:34339411-34386820 FOR (47.4 kbp)  | 15 | 34339411 | 34386820 |
| RASIP1-201 Chr16:14272315-14310785 FOR (38.4 kbp) | 16 | 14272315 | 14310785 |
| she-001 Chr16:24768468-24783484 FOR (15 kbp)      | 16 | 24768468 | 24783484 |
| etv2-001 Chr16:44778571-44783094 REV (4.5 kbp)    | 16 | 44778571 | 44783094 |
| fli1b-002 Chr16:44787606-44815039 FOR (27.4 kbp)  | 16 | 44787606 | 44815039 |
| clec14a-001 Chr17:10357902-10359008 REV (1.1 kbp) | 17 | 10357902 | 10359008 |
| CD93-201 Chr17:45726703-45728361 REV (1.6 kbp)    | 17 | 45726703 | 45728361 |
| lyve1b-001 Chr18:16403529-16406850 FOR (3.3 kbp)  | 18 | 16403529 | 16406850 |
| fli1a-002 Chr18:46987627-47050017 FOR (62.3 kbp)  | 18 | 46987627 | 47050017 |
| sox7-001 Chr20:19147468-19149714 FOR (2.2 kbp)    | 20 | 19147468 | 19149714 |
| kdr-001 Chr20:22293376-22348625 FOR (55.2 kbp)    | 20 | 22293376 | 22348625 |
| dll4-001 Chr20:28275194-28282936 FOR (7.7 kbp)    | 20 | 28275194 | 28282936 |
| sele-001 Chr20:33996012-34001480 REV (5.4 kbp)    | 20 | 33996012 | 34001480 |
| hey2-001 Chr20:39615275-39621875 REV (6.6 kbp)    | 20 | 39615275 | 39621875 |
| notch1a-204 Chr21:5028934-5036108 REV (7.1 kbp)   | 21 | 5028934  | 5036108  |
| notch1a-201 Chr21:5057239-5083787 FOR (26.5 kbp)  | 21 | 5057239  | 5083787  |
| notch1a-002 Chr21:5088100-5088163 REV (64 bp)     | 21 | 5088100  | 5088163  |
| dusp5-001 Chr22:32601322-32612453 REV (11.1 kbp)  | 22 | 32601322 | 32612453 |
| mafba-201 Chr23:3422313-3423383 REV (1 kbp)       | 23 | 3422313  | 3423383  |
| sox18-001 Chr23:8904266-8906769 FOR (2.5 kbp)     | 23 | 8904266  | 8906769  |
| krt18-201 Chr23:10454077-10457614 FOR (3.5 kbp)   | 23 | 10454077 | 10457614 |
| her9-001 Chr23:23693973-23695173 REV (1.2 kbp)    | 23 | 23693973 | 23695173 |

|                                                    |     |          |          |
|----------------------------------------------------|-----|----------|----------|
| gpr182-001 Chr23:36700336-36701412 FOR (1 kbp)     | 23  | 36700336 | 36701412 |
| ephb4b-201 Chr23:44476466-44527722 FOR (51.2 kbp)  | 23  | 44476466 | 44527722 |
| flt1-001 Chr24:22358980-22416554 REV (57.5 kbp)    | 24  | 22358980 | 22416554 |
| sh3gl3b-001 Chr25:20013171-20025548 FOR (12.3 kbp) | 25  | 20013171 | 20025548 |
|                                                    |     |          |          |
| Erythroid Genes                                    |     |          |          |
| Probe                                              | Chr | Start    | End      |
| clgn-001 Chr1:40966162-41000205 REV (34 kbp)       | 1   | 40966162 | 41000205 |
| prdx2-001 Chr1:52217037-52223503 FOR (6.4 kbp)     | 1   | 52217037 | 52223503 |
| tfr1a-001 Chr2:4738513-4756725 REV (18.2 kbp)      | 2   | 4738513  | 4756725  |
| urod-001 Chr2:27704376-27723829 REV (19.4 kbp)     | 2   | 27704376 | 27723829 |
| cahz-001 Chr2:29192910-29199877 REV (6.9 kbp)      | 2   | 29192910 | 29199877 |
| klf4b-001 Chr2:33044469-33046240 FOR (1.7 kbp)     | 2   | 33044469 | 33046240 |
| slc4a1a-001 Chr3:19955787-19977887 REV (22.1 kbp)  | 3   | 19955787 | 19977887 |
| pigq-001 Chr3:26212433-26224514 FOR (12 kbp)       | 3   | 26212433 | 26224514 |
| hbbe1.1-202 Chr3:55965826-55966464 FOR (639 bp)    | 3   | 55965826 | 55966464 |
| hbae1-202 Chr3:55972112-55972706 REV (595 bp)      | 3   | 55972112 | 55972706 |
| hbbe1.1-201 Chr3:55983018-55983643 FOR (626 bp)    | 3   | 55983018 | 55983643 |
| hbae1-201 Chr3:55990173-55990764 REV (592 bp)      | 3   | 55990173 | 55990764 |
| hbae3-202 Chr3:55998358-55999373 REV (1 kbp)       | 3   | 55998358 | 55999373 |
| add2-001 Chr5:14991725-15028531 REV (36.8 kbp)     | 5   | 14991725 | 15028531 |
| hmbsa-002 Chr5:32157627-32172574 FOR (14.9 kbp)    | 5   | 32157627 | 32172574 |
| alad-001 Chr5:62952095-62964449 FOR (12.3 kbp)     | 5   | 62952095 | 62964449 |
| ank1-003 Chr5:71805570-71930274 REV (124.7 kbp)    | 5   | 71805570 | 71930274 |
| klfd-001 Chr6:9656485-9666473 REV (9.9 kbp)        | 6   | 9656485  | 9666473  |
| tspo-201 Chr6:40509383-40512240 REV (2.8 kbp)      | 6   | 40509383 | 40512240 |
| fth1a-201 Chr7:13755565-13760561 FOR (4.9 kbp)     | 7   | 13755565 | 13760561 |
| txn-001 Chr7:25524574-25531535 REV (6.9 kbp)       | 7   | 25524574 | 25531535 |
| cpox-201 Chr8:19121660-19137899 REV (16.2 kbp)     | 8   | 19121660 | 19137899 |
| alas2-001 Chr8:21894049-21906355 FOR (12.3 kbp)    | 8   | 21894049 | 21906355 |
| slc38a5a-201 Chr8:26468724-26476425 FOR (7.7 kbp)  | 8   | 26468724 | 26476425 |
| slc25a37-001 Chr8:52578850-52604409 REV (25.5 kbp) | 8   | 52578850 | 52604409 |
| steap3-001 Chr9:879590-885678 FOR (6 kbp)          | 9   | 879590   | 885678   |
| nt5c2l1-001 Chr10:17491066-17514776 REV (23.7 kbp) | 10  | 17491066 | 17514776 |
| dmtn-001 Chr10:20162200-20180477 FOR (18.2 kbp)    | 10  | 20162200 | 20180477 |

|                                                   |    |          |          |
|---------------------------------------------------|----|----------|----------|
| slc11a2-201 Chr11:268489-273356 REV (4.8 kbp)     | 11 | 268489   | 273356   |
| gata1a-001 Chr11:26345782-26350835 REV (5 kbp)    | 11 | 26345782 | 26350835 |
| nmt1b-001 Chr12:16513733-16522908 FOR (9.1 kbp)   | 12 | 16513733 | 16522908 |
| hbbe3-001 Chr12:21691975-21693024 REV (1 kbp)     | 12 | 21691975 | 21693024 |
| hbbe2-001 Chr12:21702428-21703046 REV (619 bp)    | 12 | 21702428 | 21703046 |
| hbz-001 Chr12:21704974-21705956 FOR (983 bp)      | 12 | 21704974 | 21705956 |
| uros-202 Chr12:50189064-50195981 REV (6.9 kbp)    | 12 | 50189064 | 50195981 |
| abcb10-201 Chr13:24487030-24499769 FOR (12.7 kbp) | 13 | 24487030 | 24499769 |
| rhd-001 Chr13:46117582-46143172 REV (25.5 kbp)    | 13 | 46117582 | 46143172 |
| hmbsb-001 Chr15:22866441-22883493 REV (17 kbp)    | 15 | 22866441 | 22883493 |
| epb41b-001 Chr16:28700637-28738636 FOR (38 kbp)   | 16 | 28700637 | 28738636 |
| ppox-202 Chr16:45060563-45074680 REV (14.1 kbp)   | 16 | 45060563 | 45074680 |
| sptb-001 Chr17:38741022-38766260 FOR (25.2 kbp)   | 17 | 38741022 | 38766260 |
| ampd3b-001 Chr18:16422256-16454142 REV (31.8 kbp) | 18 | 16422256 | 16454142 |
| blvrb-001 Chr18:44560126-44573884 FOR (13.7 kbp)  | 18 | 44560126 | 44573884 |
| slc10a4-001 Chr20:23419226-23428468 REV (9.2 kbp) | 20 | 23419226 | 23428468 |
| snx3-001 Chr20:32444979-32471034 FOR (26 kbp)     | 20 | 32444979 | 32471034 |
| fech-001 Chr21:1970835-1992908 FOR (22 kbp)       | 21 | 1970835  | 1992908  |
| rfesd-001 Chr21:10254213-10256989 REV (2.7 kbp)   | 21 | 10254213 | 10256989 |
| gpd1b-001 Chr22:6943109-6953790 REV (10.6 kbp)    | 22 | 6943109  | 6953790  |
| tal1-001 Chr22:16759536-16765797 FOR (6.2 kbp)    | 22 | 16759536 | 16765797 |
| nfe2-001 Chr23:36363157-36367611 REV (4.4 kbp)    | 23 | 36363157 | 36367611 |
| tmem14c-201 Chr24:8536514-8541305 FOR (4.7 kbp)   | 24 | 8536514  | 8541305  |

## Gene targeting in zebrafish

A published protocol was followed to target the *gfi1b* locus using transcription activator-like effector nucleases (TALENs)<sup>9</sup>. The sequence 5' TCCCCCGAGCGGCCT 3' targeted by the TALENs was located at the beginning of exon 3. The TALEN nuclease was assembled in pCAG-T7-TALEN(Sangamo)-Destination vector using the Golden Gate TALEN Kit with repeat-variable diresidues (RVDs) NN NN NI NI HD HD NI NI NI NI NN NI NN NG NN NG NI NI NI and HD NI HD NG NN NN NI NG HD NG NI HD HD NG NN. The mutation in *sh339* allele



destroys a *Bsll* restriction site. In a second approach, the *gfi1b* gene was also targeted using CRISPR/Cas9 technology<sup>10</sup>. Suitable target sites within *gfi1b* exon sequences were identified with the help of the CRISPRscan UCSC track<sup>11</sup>. The two sequences targeted to generate the *qmc554* allele were 5' GGAGGAAACTCTGCCAGCTG 3' and 5' GGTGATGCAGTGGTATGTGT 3'. These are located on the template strand at the beginning and at the end of *gfi1b* exon 4, respectively. They had score values of 58 and 45. Guide RNAs targeting these sites were predicted not to also target any off-target sites. Complementary oligos representing the target site sequences (see Table S6: oligos DB567 and DB568, as well as DB584 and DB585) were designed, hybridized and cloned into the *Bsal*-digested guide RNA expression vector pDR274<sup>10</sup>. Successful cloning of the correct sequences was confirmed by Sanger sequencing (at Source Biosciences, Nottingham). Plasmids carrying the correct target sequences were linearized with *DraI* and run-off transcripts were generated in vitro using T7 RNA polymerase (Thermo Fisher, EP0111). After a 2 hour incubation at 37°C, samples were treated with *DNaseI* (Ambion) for 15 min. RNA products were verified by agarose gel electrophoresis and measured on the NanoDrop spectrophotometer. Guide RNAs were mixed with in vitro generated mRNA that encoded Cas9 mRNA codon-optimized for zebrafish. The mix was injected into 1 cell-stage zebrafish embryos that were heterozygous for the *qmc551Gt* allele of *gfi1aa*. Ten of the injected embryos were collected the following day for genotyping (see method below). PCR on genomic DNA with oligos DB569 and DB570 indicated the presence of a genomic deletion between the two target sites. As this indicated successful targeting of the *gfi1b* locus in these embryos, their siblings were raised. Once sexually mature, the fish were crossed to *wild-type* fish, and their progeny were analyzed for the presence of a deletion allele. This way the *qmc554* allele was identified that carried a 197 bp deletion and a 1 bp insertion. Siblings of the genotyped embryos were grown up to establish the *qmc554* line.

**Table S6: Oligonucleotides used for target site cloning into pDR274**

| Name  | Sequence                     | Purpose       |
|-------|------------------------------|---------------|
| DB567 | 5' taGGAGGAAACTCTGCCAGCTG 3' | gRNA1-forward |
| DB568 | 5' aaacCAGCTGGCAGAGTTTCCTCC  | gRNA1-reverse |
| DB584 | 5' taGGTGATGCAGTGGTATGTGT 3' | gRNA2-forward |
| DB585 | 5' aaacACACATACCACTGCATCACC  | gRNA2-reverse |

## Whole-mount in situ hybridisation (WISH)

WISH experiments followed a published protocol<sup>12</sup>. Probes used are listed in Table S7. After staining embryos were photographed in 80% glycerol in PBS (phosphate-buffered saline) plus 0.1% Tween 20. For genotyping, individual embryos were washed back into PBS/Tween via 50% and 30% glycerol. Following 3 washes in PBS/Tween, embryos were incubated first in 100  $\mu$ L 300 mM NaCl at 65 °C for 4 hours<sup>13</sup> and then in 25  $\mu$ L 1x Base solution (5x Base solution: 0.5g NaOH, 2 mL 0.5M EDTA (pH8), filled up with H<sub>2</sub>O to 100 mL) at 95 °C for 20 min. The sample was cooled for a minute at room temperature (RT) before 25  $\mu$ L 1x Neutralisation solution (5x Neutralisation solution: 3.15g Tris-HCl in 100 mL of H<sub>2</sub>O) was added. The sample was vortexed and then centrifuged at 3,000 rpm for 5 min in a Microfuge. 2  $\mu$ L of the supernatant was used for PCR.

**Table S7: Information on WISH probes used in the study**

| Gene                 | Reference                            |
|----------------------|--------------------------------------|
| <i>cahz</i>          | 14                                   |
| <i>cdh5</i>          | 15                                   |
| <i>clec14a</i>       | 15                                   |
| <i>cmyb</i>          | 16                                   |
| <i>epor</i>          | 17                                   |
| <i>etv2/etsrp</i>    | 5                                    |
| <i>flk1/kdrl</i>     | 18–20                                |
| <i>gfi1aa</i>        | 2,21,22                              |
| <i>gfi1ab</i>        | 2,23                                 |
| <i>gfi1b</i>         | 2,22                                 |
| <i>klf1</i>          | 24                                   |
| <i>rag1</i>          | 25                                   |
| <i>slc4a1a</i>       | 26                                   |
| <i>sox7</i>          | 27–29                                |
| <i>sptlc2a</i>       | This publication, ENSDARG00000018976 |
| <i>myoD1</i>         | 30                                   |
| <i>pax2a</i>         | 31                                   |
| <i>nkx2.5</i>        | 32                                   |
| <i>npas4l/cloche</i> | 33                                   |

## Genomic DNA isolation

Adult fish were anaesthetized with MS222 for caudal fin clipping. Fin clips and fresh embryos used for genotyping were incubated in proteinase K-containing lysis buffer at 55°C overnight. The volumes were 50 µL for a fin clip, 10 µL per embryo if batches were analysed, and 20 µL for a single embryo. Following the overnight incubation, proteinase K was heat-inactivated for 20 min at 99°C. Water was added to 100 µL. 1-10 µL were used for PCR amplification.

## PCR amplification, DNA purification and sequencing

Standard PCRs on cDNA and genomic DNA were performed using Taq polymerase (New England Biolabs, M0273). PCR fragments were cleaned up by agarose gel electrophoresis. DNA was eluted from agarose gels using the GenElute Gel extraction kit (Sigma, NA1111). Some PCR fragments were sent for Sanger sequencing (Source Bioscience Nottingham). Others were cloned into pGEM-Teasy (Promega, A1360) and then sequenced.

## Genotyping of the mutant and wildtype zebrafish lines

The oligos used for genotyping are listed in Table S7. Genotyping of the mutant *gfi1b* allele *sh339* involves the use of a nested PCR using oligos DB913 and DB914 in the first and oligos DB915 and DB916 in the second step. The expected PCR products are 954 and 687 bp fragments, respectively. Oligo DB826 is used to sequence the gel-extracted nested product to detect the single base deletion present in the mutant allele. Genotyping of the *qmc554* allele is done by PCR using oligos DB569 and DB570. The PCR on the wild-type allele gives a 305 bp fragment, while the PCR on the mutant allele generates a 109 bp fragment. Genotyping of the *qmc551* and the two alternative wild-type alleles of *gfi1aa* also relies purely on PCR. Oligos DB278 and DB306 are used to amplify the *qmc551* allele. The resulting PCR fragment has a size of 491 bp. The wild-type allele with the larger intron 1 sequence is amplified using oligo pairs DB1019 and DB986, giving a fragment of 1330 bp. Oligos DB1019 and DB239 are used to detect the smaller wild-type allele, producing a PCR product of 477 bp. Genotyping of the *sa11633* allele of *gfi1aa* involved a PCR

with oligos DB819 and DB820. The resulting 233 bp fragment is sequenced with DB820 to detect the C to A substitution in exon 4 of *gfi1aa*. Oligo sequences are provided in Table S8.

**Table S8: Oligonucleotides used for PCR amplification and DNA Sequencing**

| Name   | Sequence                    | Purpose                              |
|--------|-----------------------------|--------------------------------------|
| DB913  | 5' ACACCTTGTAATAAACTGCCACT  | <i>sh339</i> first PCR               |
| DB914  | 5' TGAACCTGGAAACCTGTAACC 3' | <i>sh339</i> first PCR               |
| DB915  | 5' TCCAAAGTCGACAGAGCAGA 3'  | <i>sh339</i> nested PCR              |
| DB916  | 5' TTGGAACCACTTGAGGGAGA 3'  | <i>sh339</i> nested PCR              |
| DB826  | 5' TGTAAGAGGGACGTCTGGTG 3'  | <i>sh339</i> sequencing              |
| DB569  | 5' TGTGGCATGTGTAGGGTAGA 3'  | <i>qmc554</i> PCR                    |
| DB570  | 5' GACCTTGTCGCAGGTGATG 3'   | <i>qmc554</i> PCR                    |
| DB278  | 5' TCCACTTTGCCTTTCTCTCC 3'  | <i>qmc551</i> PCR                    |
| DB306  | 5' CGATGCCCTTCAGCTCGAT 3'   | <i>qmc551</i> PCR                    |
| DB1019 | 5' TATGGCCTGCTCGGAGTTTG 3'  | <i>gfi1aa wt1</i> and <i>wt2</i> PCR |
| DB986  | 5' GGTTATCTCTATGCTGATCACGC  | <i>gfi1aa wt1</i> PCR                |
| DB239  | 5' GCGCCCGTTTGCTCTTCACC 3'  | <i>gfi1aa wt2</i> PCR                |
| DB819  | 5' TCAGCCTTTTCGACATGTCCT 3' | <i>sa11633</i> PCR                   |
| DB820  | 5' AGCCTCGATTATCCAGCAGG 3'  | <i>sa11633</i> PCR + seq.            |

### Flow cytometric analysis of kidney marrow cells

Blood cells were collected from adult kidneys and analysed on the flow cytometer following a published protocol<sup>34</sup>. Forward scatter, side scatter and GFP fluorescence characteristics of KM cells were analyzed on a Beckman Coulter MoFlo Astrios cell sorter using the Kaluza software. Sytox was used to exclude dead cells.

### Microscopy and Imaging

Embryos were examined on a Nikon SMZ-1500 microscope with epifluorescence attachment. GFP was detected with the help of a FITC filter set. Sections were analyzed on a Nikon Eclipse i80. Images were taken with a Nikon DS-5Mc/DS-U1 camera setup operated by the Nikon ACT-2U software. Images were collated in

Photoshop CS6. Diagrams were drawn with Apple Graphic Software.

## References

1. Westerfield M. The zebrafish book. A guide for the laboratory use of zebrafish (*Danio rerio*). Eugene: University of Oregon Press; 2000.
2. Thambyrajah R, Ucanok D, Jalali M, et al. A gene trap transposon eliminates haematopoietic expression of zebrafish *Gfi1aa*, but does not interfere with haematopoiesis. *Dev. Biol.* 2016;417(1):.
3. Kettleborough RNW, Busch-Nentwich EM, Harvey SA, et al. A systematic genome-wide analysis of zebrafish protein-coding gene function. *Nature.* 2013;496(7446):494–497.
4. Robu ME, Larson JD, Nasevicius A, et al. p53 activation by knockdown technologies. *PLoS Genet.* 2007;3(5):e78.
5. Sumanas S, Lin S. Ets1-related protein is a key regulator of vasculogenesis in zebrafish. *PLoS Biol.* 2006;4(1):e10.
6. Rowlinson JM, Gering M. Hey2 acts upstream of Notch in hematopoietic stem cell specification in zebrafish embryos. *Blood.* 2010;116(12):2046–2056.
7. Mortazavi A, Williams BA, McCue K, Schaeffer L, Wold B. Mapping and quantifying mammalian transcriptomes by RNA-Seq. *Nat. Methods.* 2008;5(7):621–628.
8. Anders S, Huber W. Differential expression analysis for sequence count data. *Genome Biol.* 2010;11(10):R106.
9. Cermak T, Doyle EL, Christian M, et al. Efficient design and assembly of custom TALEN and other TAL effector-based constructs for DNA targeting. *Nucleic Acids Res.* 2011;39(12):e82.
10. Hwang WY, Fu Y, Reyon D, et al. Efficient genome editing in zebrafish using a CRISPR-Cas system. *Nat. Biotechnol.* 2013;31(3):227–229.
11. Moreno-Mateos MA, Vejnar CE, Beaudoin J-D, et al. CRISPRscan: designing highly efficient sgRNAs for CRISPR-Cas9 targeting in vivo. *Nat. Methods.* 2015;12(10):982–988.
12. Broadbent J, Read EM. Wholemount in situ hybridization of *Xenopus* and

- zebrafish embryos. *Methods Mol. Biol.* 1999;127:57–67.
13. Gansner JM, Madsen EC, Mecham RP, Gitlin JD. Essential role for fibrillin-2 in zebrafish notochord and vascular morphogenesis. *Dev. Dyn.* 2008;237(10):2844–2861.
  14. Qian F, Zhen F, Ong C, et al. Microarray analysis of zebrafish cloche mutant using amplified cDNA and identification of potential downstream target genes. *Dev. Dyn.* 2005;233(3):1163–1172.
  15. Sumanas S, Joraniak T, Lin S. Identification of novel vascular endothelial-specific genes by the microarray analysis of the zebrafish cloche mutants. *Blood.* 2005;106(2):534–541.
  16. Thompson MA, Ransom DG, Pratt SJ, et al. The cloche and spadetail genes differentially affect hematopoiesis and vasculogenesis. *Dev. Biol.* 1998;197(2):248–269.
  17. Paffett-Lugassy N, Hsia N, Fraenkel PG, et al. Functional conservation of erythropoietin signaling in zebrafish. *Blood.* 2007;110(7):2718–2726.
  18. Fouquet B, Weinstein BM, Serluca FC, Fishman MC. Vessel patterning in the embryo of the zebrafish: guidance by notochord. *Dev. Biol.* 1997;183(1):37–48.
  19. Liao W, Bisgrove BW, Sawyer H, et al. The zebrafish gene cloche acts upstream of a flk-1 homologue to regulate endothelial cell differentiation. *Development.* 1997;124(2):381–389.
  20. Sumoy L, Keasey JB, Dittman TD, Kimelman D. A role for notochord in axial vascular development revealed by analysis of phenotype and the expression of VEGF-2 in zebrafish flh and ntl mutant embryos. *Mech. Dev.* 1997;63(1):15–27.
  21. Wei W, Wen L, Huang P, et al. Gfi1.1 regulates hematopoietic lineage differentiation during zebrafish embryogenesis. *Cell Res.* 2008;18(6):677–685.
  22. Cooney JD, Hildick-Smith GJ, Shafizadeh E, et al. Teleost growth factor independence (gfi) genes differentially regulate successive waves of hematopoiesis. *Dev. Biol.* 2013;373(2):431–441.
  23. Dufourcq P, Rastegar S, Strähle U, Blader P. Parapineal specific expression of gfi1 in the zebrafish epithalamus. *Gene Expr. Patterns.* 2004;4(1):53–57.

24. Nishikawa K, Kobayashi M, Masumi A, et al. Self-association of Gata1 enhances transcriptional activity in vivo in zebra fish embryos. *Mol. Cell. Biol.* 2003;23(22):8295–8305.
25. Willett CE, Zapata AG, Hopkins N, Steiner LA. Expression of zebrafish rag genes during early development identifies the thymus. *Dev. Biol.* 1997;182(2):331–341.
26. Juarez MA, Su F, Chun S, Kiel MJ, Lyons SE. Distinct roles for SCL in erythroid specification and maturation in zebrafish. *J. Biol. Chem.* 2005;280(50):41636–41644.
27. Cermenati S, Moleri S, Cimbro S, et al. Sox18 and Sox7 play redundant roles in vascular development. *Blood.* 2008;111(5):2657–2666.
28. Herpers R, van de Kamp E, Duckers HJ, Schulte-Merker S. Redundant roles for sox7 and sox18 in arteriovenous specification in zebrafish. *Circ. Res.* 2008;102(1):12–15.
29. Pendeville H, Winandy M, Manfroid I, et al. Zebrafish Sox7 and Sox18 function together to control arterial-venous identity. *Dev. Biol.* 2008;317(2):405–416.
30. Weinberg ES, Allende ML, Kelly CS, et al. Developmental regulation of zebrafish MyoD in wild-type, no tail and spadetail embryos. *Development.* 1996;
31. Krauss S, Johansen T, Korzh V, Fjose A. Expression pattern of zebrafish pax genes suggests a role in early brain regionalization. *Nat.* 1991;
32. Chen JN, Fishman MC. Zebrafish tinman homolog demarcates the heart field and initiates myocardial differentiation. *Development.* 1996;122(12):3809–3816.
33. Reischauer S, Stone OA, Villasenor A, et al. Cloche is a bHLH-PAS transcription factor that drives haemato-vascular specification. *Nature.* 2016;535(7611):294–298.
34. Traver D, Paw BH, Poss KD, et al. Transplantation and in vivo imaging of multilineage engraftment in zebrafish bloodless mutants. *Nat. Immunol.* 2003;4(12):1238–1246.



# Supplemental Figures

**A** Genes with the highest expression (RPKM) in *qmc551 het* prRBCs at 20 hpf

| GeneID             | GeneName                 | Het      | HomMO   | log2(HomMO/Het) |
|--------------------|--------------------------|----------|---------|-----------------|
| ENSDARG00000089475 | hbae1                    | 50932.95 | 4069.97 | -3.65           |
| ENSDARG00000038147 | hbbe3                    | 39256.99 | 9295.60 | -2.08           |
| ENSDARG00000087390 | hbbe1.3                  | 14579.52 | 777.46  | -4.23           |
| ENSDARG00000089963 | hbbe1.1                  | 8677.93  | 3236.74 | -1.42           |
| ENSDARG00000079305 | hbae3                    | 8265.50  | 1916.24 | -2.11           |
| ENSDARG00000089124 | hbae1.3                  | 5669.17  | 686.12  | -3.05           |
| ENSDARG00000055723 | hsp70l                   | 4941.06  | 4198.98 | -0.23           |
| ENSDARG00000090689 | hbbe1.2                  | 3618.63  | 725.86  | -2.32           |
| ENSDARG00000036044 | rps20                    | 3195.65  | 1529.80 | -1.06           |
| ENSDARG00000092807 | rpl41                    | 2947.73  | 1445.86 | -1.03           |
| ENSDARG00000054818 | rpl32                    | 2631.49  | 1904.14 | -0.47           |
| ENSDARG00000021924 | hsp70.3                  | 2630.99  | 2445.10 | -0.11           |
| ENSDARG00000068992 | hspa8                    | 2515.63  | 2032.45 | -0.31           |
| ENSDARG00000006818 | urod                     | 2496.66  | 475.96  | -2.39           |
| ENSDARG00000076532 | wu:fb18c02-Prothymosin A | 2489.90  | 3665.67 | 0.56            |
| ENSDARG00000015551 | fth1a                    | 2435.46  | 875.31  | -1.48           |
| ENSDARG00000045143 | hbbe2                    | 1653.67  | 953.95  | -0.79           |
| ENSDARG00000092362 | hsp70.2                  | 1446.34  | 1268.82 | -0.19           |
| ENSDARG00000054155 | pcna                     | 1377.28  | 759.89  | -0.86           |
| ENSDARG00000024746 | hsp90aa1.2               | 1369.11  | 1366.00 | 0.00            |

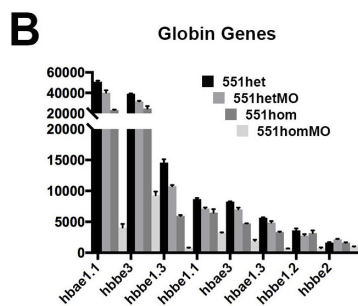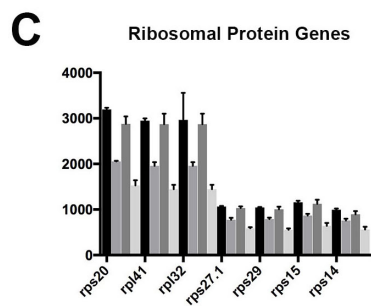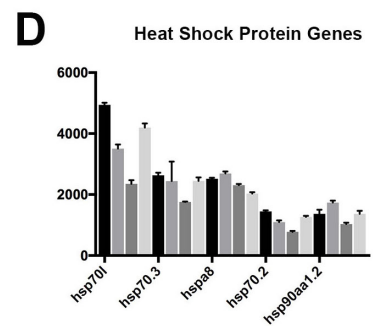

**E** Genes with the highest expression (RPKM) in *qmc551 hom* and *gfi1b* morphant prRBCs at 20 hpf

| GeneID             | GeneName                   | Het      | HomMO   | log2(HomMO/Het) |
|--------------------|----------------------------|----------|---------|-----------------|
| ENSDARG00000038147 | hbbe3                      | 39256.99 | 9295.60 | -2.08           |
| ENSDARG00000055723 | hsp70l                     | 4941.06  | 4198.98 | -0.23           |
| ENSDARG00000089475 | hbae1                      | 50932.95 | 4069.97 | -3.65           |
| ENSDARG00000076532 | wu:fb18c02 - Prothymosin A | 2489.90  | 3665.67 | 0.56            |
| ENSDARG00000089963 | hbbe1.1                    | 8677.93  | 3236.74 | -1.42           |
| ENSDARG00000090186 | rps27.2                    | 423.43   | 3124.38 | 2.88            |
| ENSDARG00000021924 | hsp70.3                    | 2630.99  | 2445.10 | -0.11           |
| ENSDARG00000077777 | tmsb4x                     | 700.73   | 2284.29 | 1.70            |
| ENSDARG00000017624 | krt4                       | 239.75   | 2067.37 | 3.11            |
| ENSDARG00000076667 | ccng1                      | 422.25   | 2051.02 | 2.28            |
| ENSDARG00000068992 | hspa8                      | 2515.63  | 2032.45 | -0.31           |
| ENSDARG00000079305 | hbae3                      | 8265.50  | 1916.24 | -2.11           |
| ENSDARG00000054818 | rpl32                      | 2631.49  | 1904.14 | -0.47           |
| ENSDARG00000046655 | hspa5                      | 855.45   | 1625.66 | 0.93            |
| ENSDARG00000036044 | rps20                      | 3195.65  | 1529.80 | -1.06           |
| ENSDARG00000092807 | si:dkey-151g10.6 - rpl41   | 2947.73  | 1445.86 | -1.03           |
| ENSDARG00000037746 | actb1                      | 880.73   | 1437.02 | 0.71            |
| ENSDARG00000024746 | hsp90aa1.2                 | 1369.11  | 1366.00 | 0.00            |
| ENSDARG00000035423 | zgc:123194 - tubb2b        | 1285.68  | 1359.98 | 0.08            |
| ENSDARG00000092362 | hsp70.2                    | 1446.34  | 1268.82 | -0.19           |

Figure S1

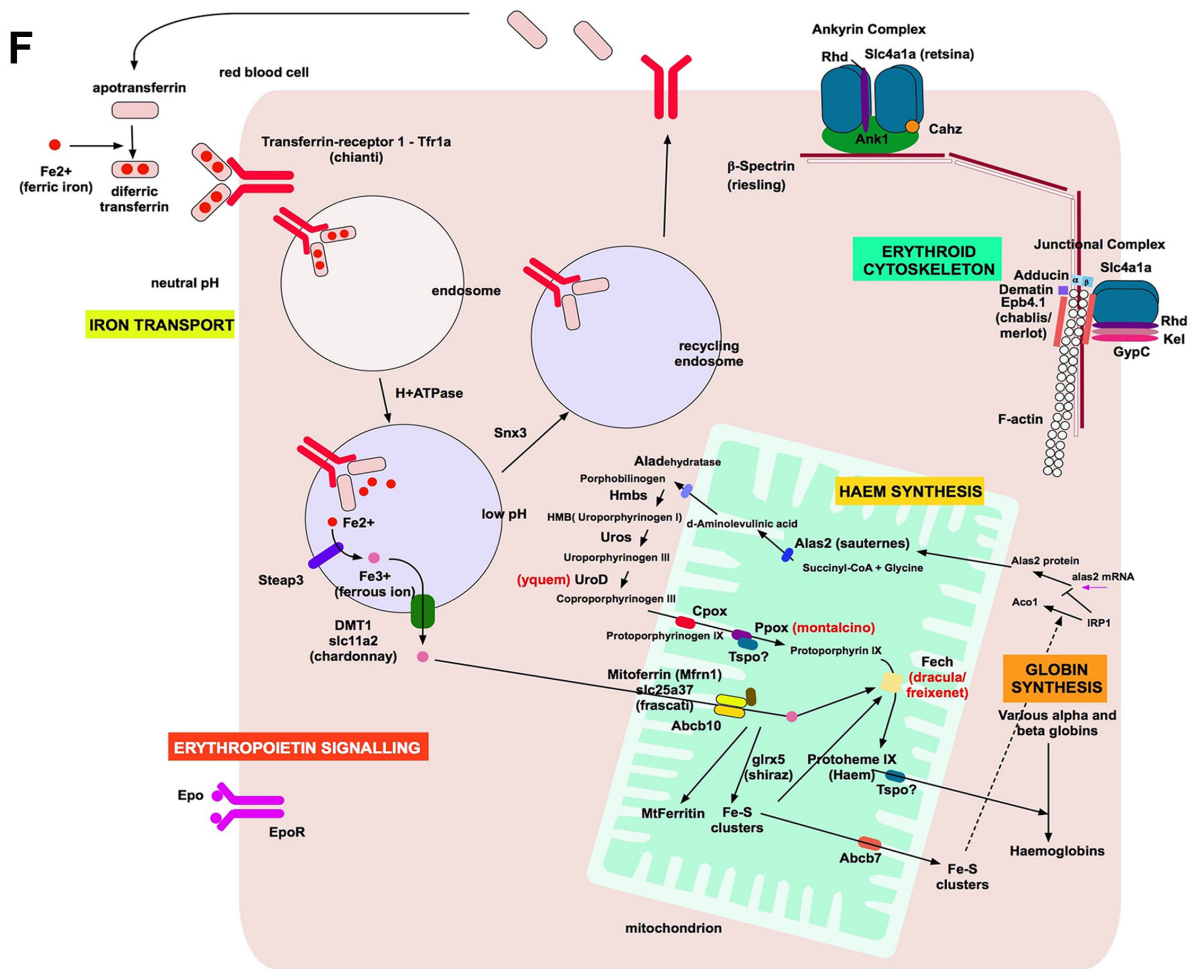

| Iron Transport and Metabolism |                                                      |      |       |
|-------------------------------|------------------------------------------------------|------|-------|
| Gene                          | Protein                                              | Het  | HomMO |
| tfr1a                         | Transferrin receptor 1a                              | 133  | 45    |
| steap3a                       | Endosomal Ferrireductase                             | 16   | 1     |
| slc11a2                       | solute-coupled divalent metal ion transporter (DMT1) | 263  | 101   |
| slc25a37                      | Mitochondrial ion transporter                        | 47   | 2     |
| abcb10                        | abc binding cassette b10                             | 182  | 53    |
| snx3                          | sorting nexin 3                                      | 95   | 33    |
| frrs1b                        | ferric-chelate reductase 1b                          | 48   | 7     |
| glrx5                         | glutaredoxin 5                                       | 1260 | 847   |
| abcb7                         | abc binding cassette b7                              | 74   | 37    |
| aco1                          | iron regul. pr. 1 / aconitase 1                      | 62   | 47    |

| Erythroid cytoskeleton |                               |     |       |
|------------------------|-------------------------------|-----|-------|
| Gene                   | Protein                       | Het | HomMO |
| slc4a1a                | Erythroid band 3              | 158 | 1     |
| ebp41b                 | Erythroid Protein Band 4.1b   | 70  | 6     |
| sptb                   | beta-Spectrin                 | 99  | 18    |
| rhd                    | Rh blood group, D antigen     | 138 | 11    |
| add1                   | Adducin 1                     | 17  | 14    |
| add2                   | Adducin 2                     | 18  | 1     |
| dmtn                   | dematin actin binding protein | 37  | 11    |
| ank1                   | Ankyrin 1                     | 8   | 2     |
| cahz                   | Carbonic anhydrase            | 365 | 70    |
| gypc                   | glycophorin C                 | 22  | 71    |
| kel                    | kell blood group              | 4   | 3     |

| Haem synthesis |                                    |      |       |
|----------------|------------------------------------|------|-------|
| Gene           | Protein                            | Het  | HomMO |
| alas2          | aminolaevulinatase 2               | 924  | 145   |
| alad           | aminolaevulinatase dehydratase     | 459  | 87    |
| hmbsa          | hydroxymethyl-bilane synthase A    | 651  | 66    |
| hmbsb          | hydroxymethyl- bilane synthase B   | 702  | 50    |
| uros           | uroporphyrinogen III synthase      | 131  | 23    |
| urod           | uroporphyrinogen III decarboxylase | 2497 | 476   |
| cpoX           | coproporphyrinogen oxidase         | 1020 | 292   |
| ppoX           | protoporphyrinogen oxidase         | 57   | 9     |
| fech           | Ferrochelataze                     | 67   | 10    |
| tspo           | translocator protein               | 460  | 51    |

Figure S1

**Figure S1: The late erythroid transcription programme is depressed in Gfi1aa/1b-deficient primitive red blood cells.** Analysis of the transcriptomes of populations of prRBCs isolated from Gfi1aa and/or Gfi1b-deficient embryos. **(A)** List of genes that are most highly expressed in 20 hpf *qmc551* heterozygous prRBCs. **(B-D)** Expression levels of globin genes, ribosomal protein genes and heat shock protein genes in all samples. Of these highly expressed genes only the globin genes were reduced at a lower level in the absence of Gfi1aa and Gfi1b. **(E)** List of genes that are most highly expressed in *gfi1b* morphant *qmc551hom* embryos. **(F)** The red blood cell diagram depicts proteins involved in important aspects of RBC biology, like iron transport and metabolism, haem synthesis and the erythroid cytoskeleton. Mutations affecting some of these proteins are known to give erythroid phenotypes in zebrafish. The names of the hypochromic mutants are given in brackets. Mutants which display erythroporphyria are highlighted in red.

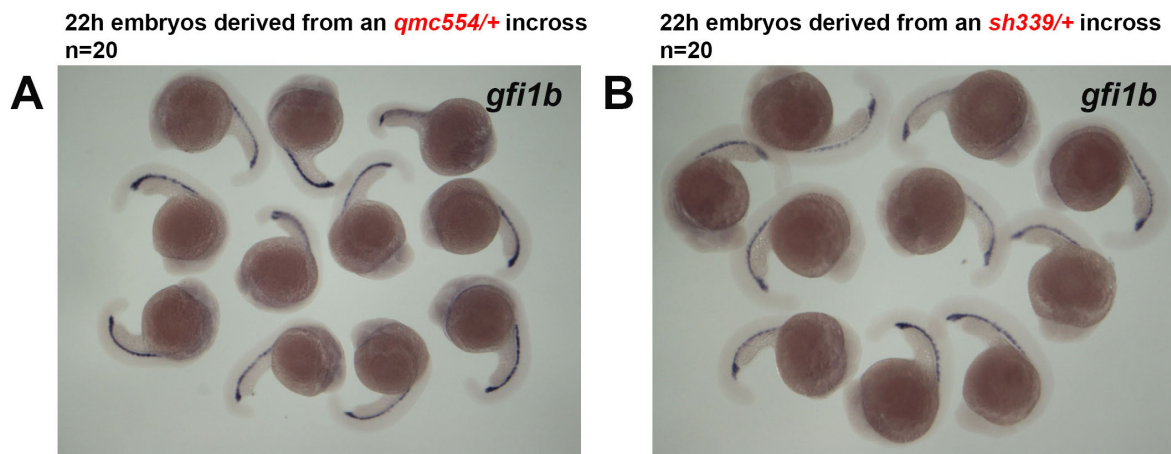

**Figure S2**

**Figure S2: *Gfi1b<sup>qmc554</sup>* and *gfi1b<sup>sh339</sup>* mRNAs are stable.** WISH experiments with *gfi1b* probe on 22 hpf embryos derived from incrosses of *gfi1b<sup>qmc554</sup>* (A) and *gfi1b<sup>sh339</sup>* (B) heterozygous fish. Genotyping identified 5 homozygous *gfi1b<sup>qmc554</sup>* carriers in the cohort shown in (A). Siblings of the embryos shown in (B) were stained for *gfi1aa* expression (Fig. 4E). Some of these displayed elevated *gfi1aa* expression and turned out to be *gfi1b<sup>sh339</sup>hom* mutants.

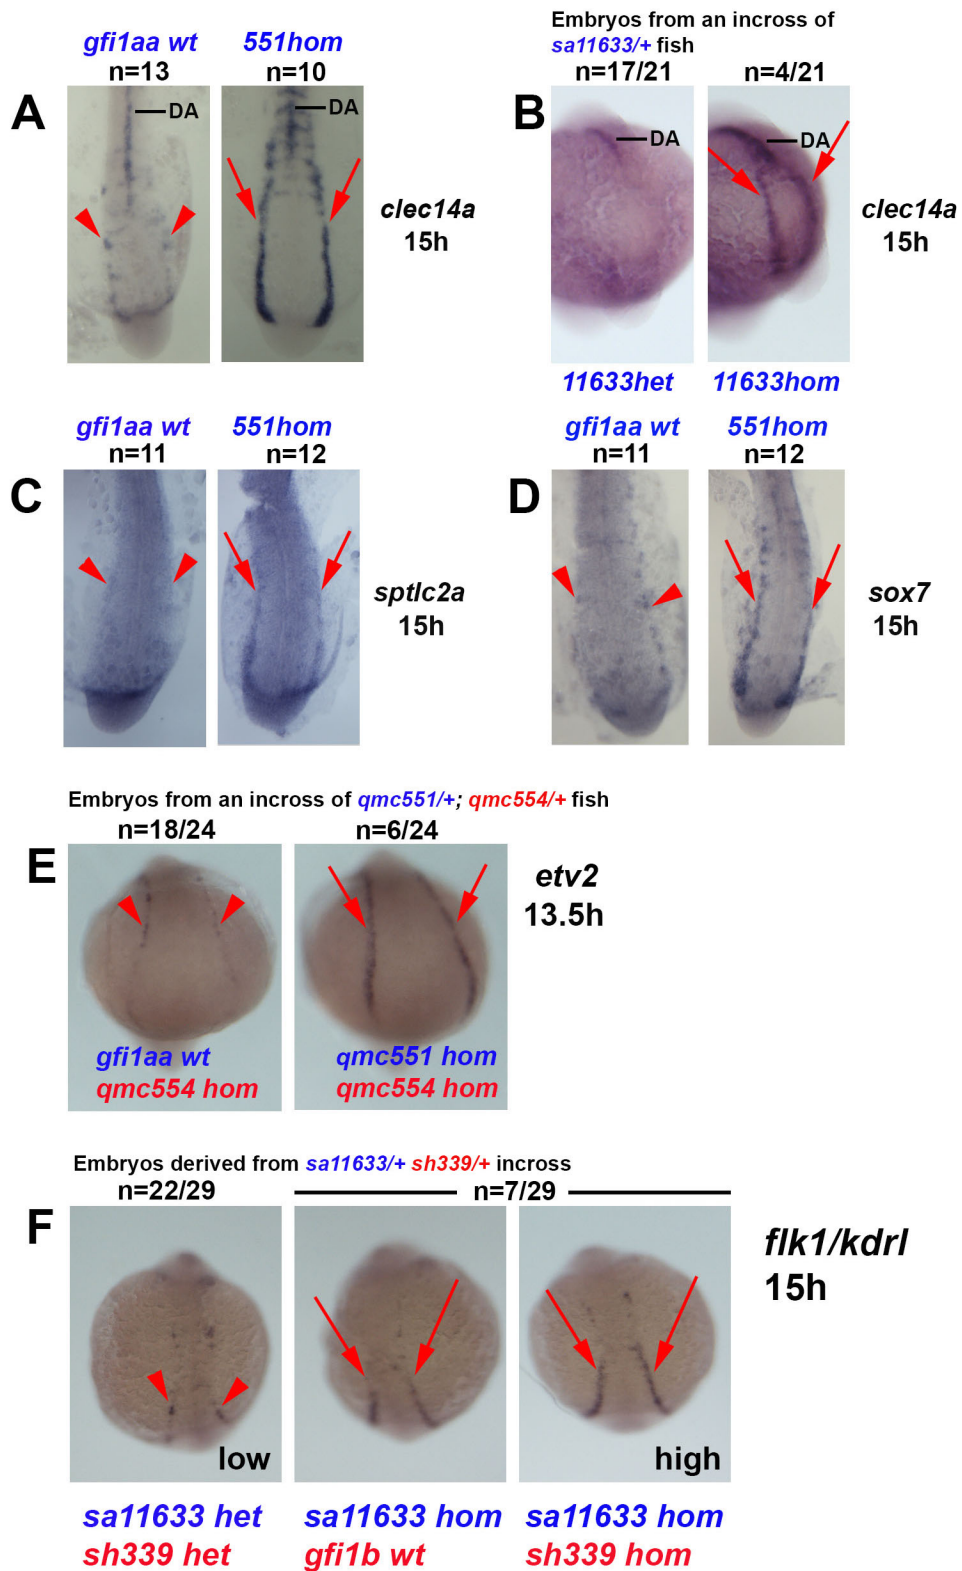

**Figure S3**

**Figure S3: Endothelial genes display expanded expression patterns in the posterior lateral mesoderm of *gfi1aa<sup>qmc551</sup>hom* and *gfi1aa<sup>sa11633</sup>hom* embryos.** Images show embryos after WISH experiments. Flat-mounts are shown in panels (A), (C) and (D). Posterior views of embryos are depicted in panels (B) and (E).

Dorsal views are shown in (F). The genotype of the embryos shown in (A), (C) and (D) was known as the embryos were derived from incrosses of *wt* and *gfi1aa<sup>qmc551</sup>hom* fish. Embryos in (B), (E) and (F) had to be genotyped after the WISH experiment. In (B), all four embryos with increased *clec14a* expression were *gfi1aa<sup>sa11633</sup>* homozygous mutants. In (E), the 6 embryos with an expanded *etv2* expression pattern were also genotyped and found to be homozygous *gfi1aa<sup>qmc551</sup>* mutants. In (F), two of the seven embryos with increased *flk1/kdr1* expression were genotyped and revealed to be *gfi1aa<sup>sa11633</sup>* homozygous. None of the control embryos we genotyped in (B), (E) and (F) were homozygous *gfi1aa* mutants. Some of them in (E) and (F) were *gfi1b* mutants, confirming that loss of Gfi1b expression does not cause EC gene expression to be expanded. The figure panels show representative examples. Red arrowheads point at normal EC gene expression in small clusters of EC progenitors. Red arrows highlight expanded expression of ECs in the posterior lateral mesoderm.

18-19 hpf embryos derived from an incross of *sh339 het* fish

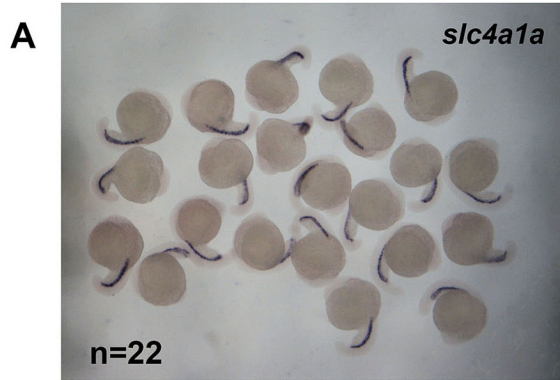

19 hpf embryos derived from an incross of *qmc554 het* fish

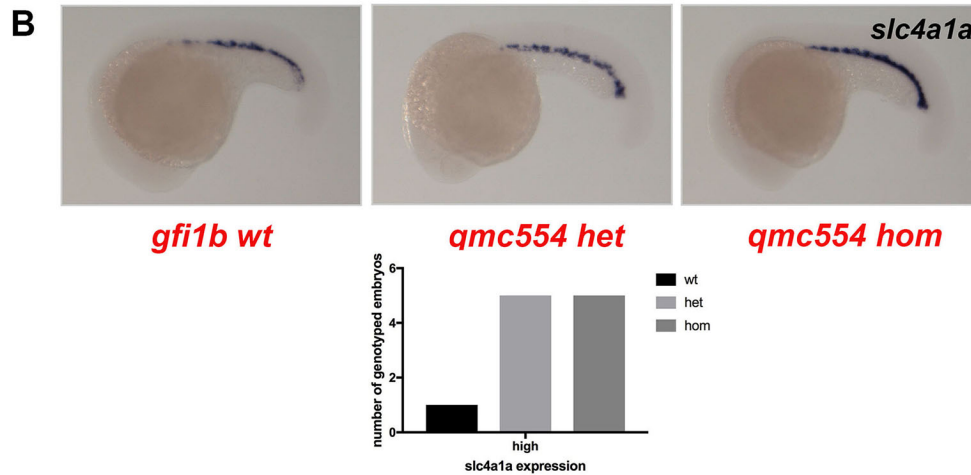

18 hpf embryos derived from an incross of *qmc551 het* fish

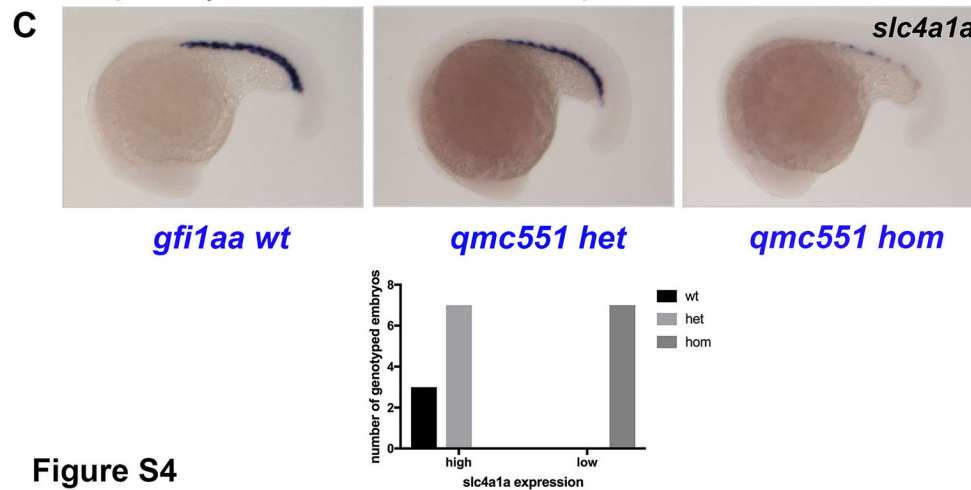

**Figure S4**

**Figure S4: The timely onset of *slc4a1a* expression in red blood cells of 18-20 hpf embryos requires the presence of *Gfi1aa*, but not the expression of *Gfi1b*.** Embryos were stained by whole-mount in situ hybridization. Lateral views of embryos are presented in all panels. A subset of embryos was genotyped. The genotyping results are presented in bar charts below the photographs.

24 hpf embryos from a *qmc551/+;qmc554/+* incross stained for *slc4a1a* expression

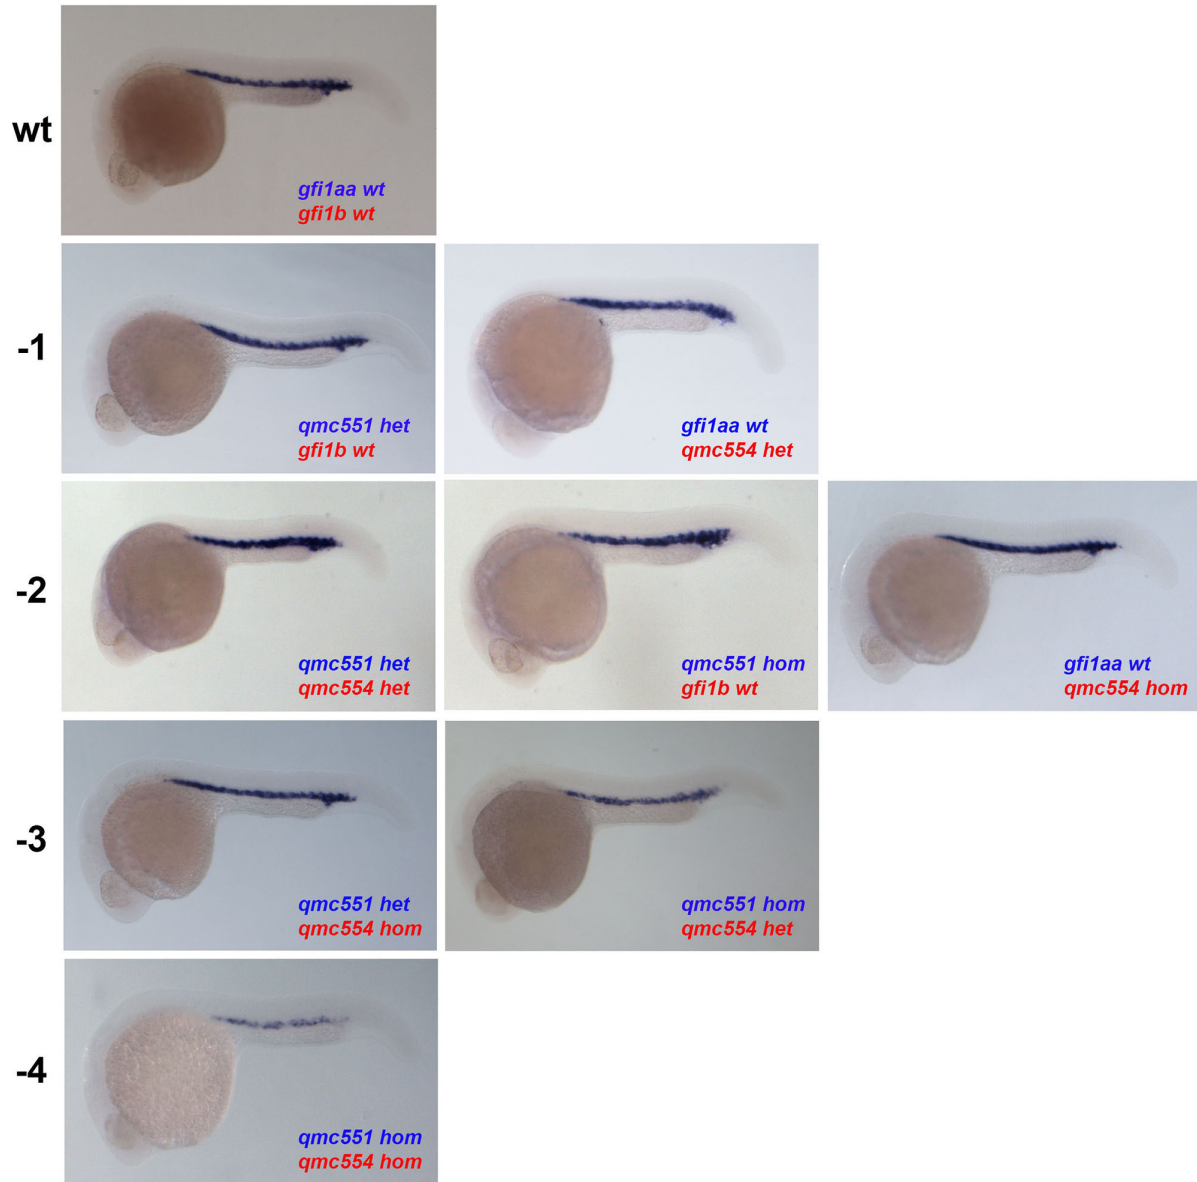

**Figure S5**

**Figure S5: At 24 hpf, erythroid *slc4a1a* expression is reduced most strongly in *gfi1aa/gfi1b* double mutant embryos.** 7 out of 89 embryos derived from an incross of double heterozygous *gfi1aa<sup>qmc551</sup>* and *gfi1b<sup>qmc554</sup>* parents displayed strongly reduced *slc4a1a* expression in a whole-mount in situ hybridization experiment. All 7 turned out to be double homozygous embryos in the subsequent PCR-based genotyping experiment. A further 40 embryos were photographed and genotyped. Representative embryos for each genotype are shown. The images show lateral views of the stained embryos. They are arranged in the shape of a pyramid based on the combined number of *wt* copies of *gfi1aa* and *gfi1b* lost in the genotyped embryos.

22-23 hpf embryos from a *qmc551/+;qmc554/+* incross

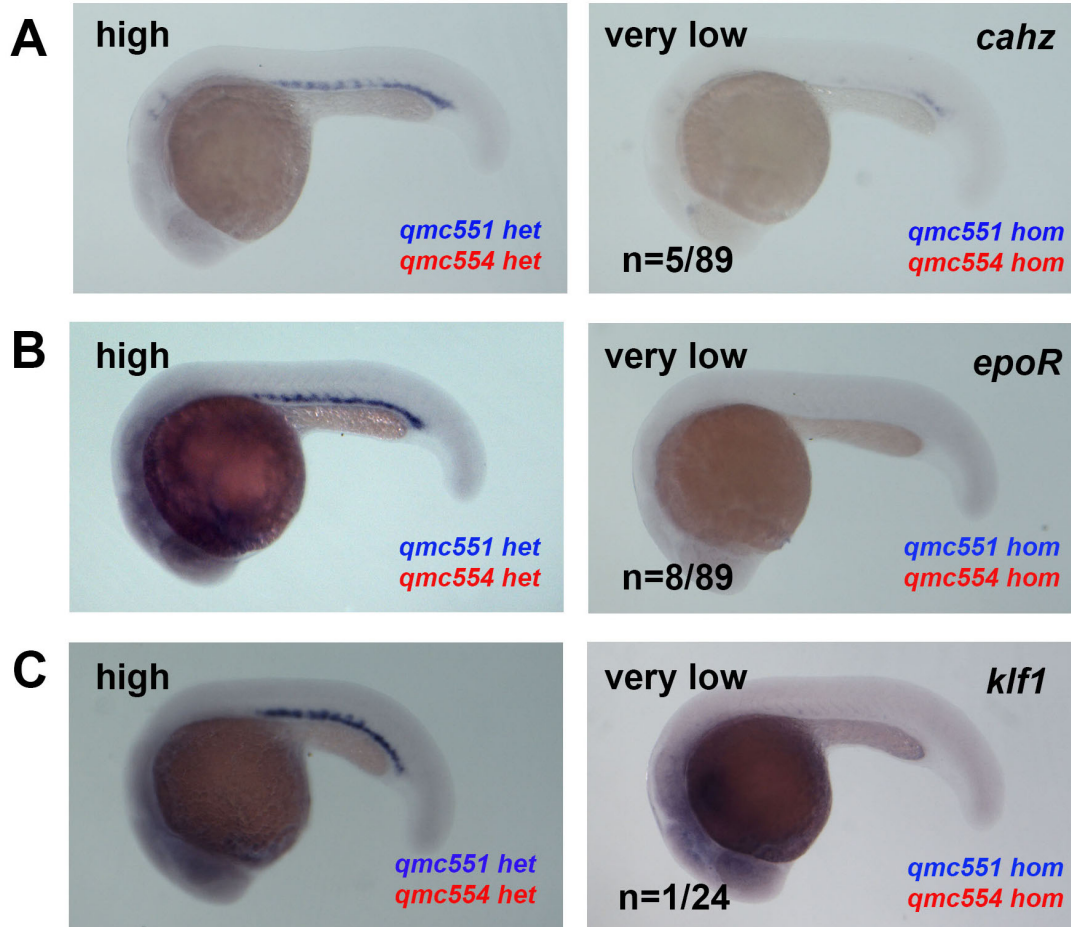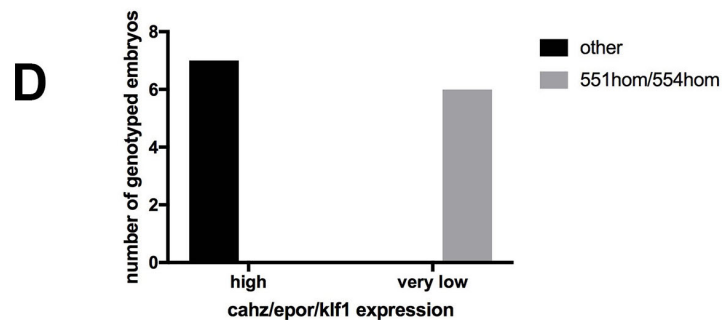

## Figure S6

**Figure S6: Gfi1b rescues the expression of the erythroid genes *cahz*, *epor* and *klf1* in Gfi1aa-depleted embryos.** The panels show lateral views of representative genotyped embryos. Six of the embryos that showed very low expression of the 3 erythroid genes were genotyped and turned out to be double homozygous *gfi1aa<sup>qmc551</sup>/gfi1b<sup>qmc554</sup>* carriers. None of the well stained embryos displayed this genotype.



3 dpf embryos from an incross of *sa11633/+;sh339/+* fish

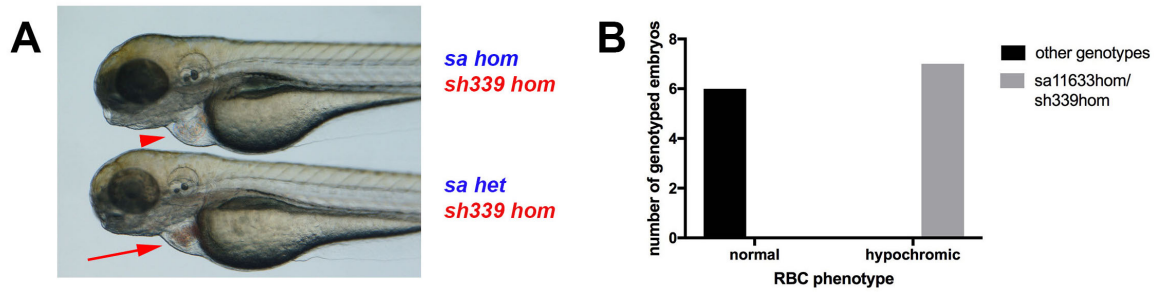

**Figure S7**

**Figure S7: Double homozygous *gfi1aa<sup>sa11633</sup>/gfi1b<sup>sh339</sup>* embryos carry hypochromic blood cells. (A)** Lateral view of 3 dpf representative embryos are presented. The red arrow highlights the normal red colour of blood cells in the heart. The red arrowhead points at hypochromic blood cells. **(B)** Embryos with normal or hypochromic blood were genotyped. Bar charts summarize the results of these experiments.

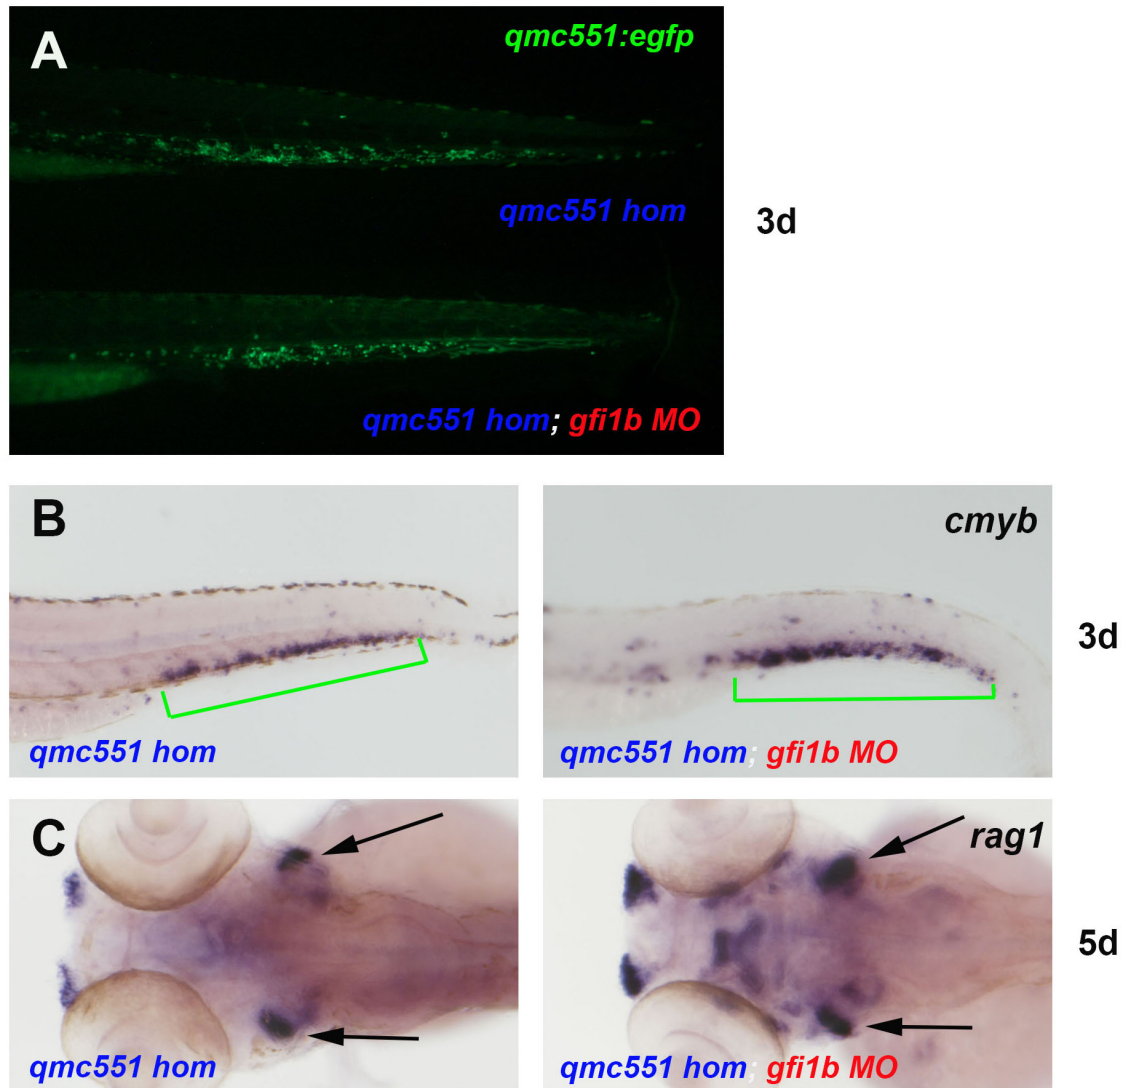

**Figure S8**

**Figure S8: Gfi1b splice-morphant *gfi1aa<sup>qmc551</sup>* homozygous mutant embryos do not display obvious defects in definitive haematopoiesis.** (A) lateral view of the posterior trunk and tail region of *gfi1aa<sup>qmc551</sup>* homozygous embryos at 3 dpf that were or were not injected with *gfi1b* exon 4 splice morpholinos (n=10 for each) (B-C) WISH experiments on *gfi1aa<sup>qmc551</sup>* homozygous mutant embryos injected or not injected with *gfi1b* exon 4 splice morpholinos. The green brackets in (B) highlight *cmyb*-positive cells in the caudal haematopoietic tissue (n=12 for each). The black arrows point at *rag1* expression in the thymus (n=18 for each). Views are lateral in (B) and dorsal in (C). Anterior is towards the left.

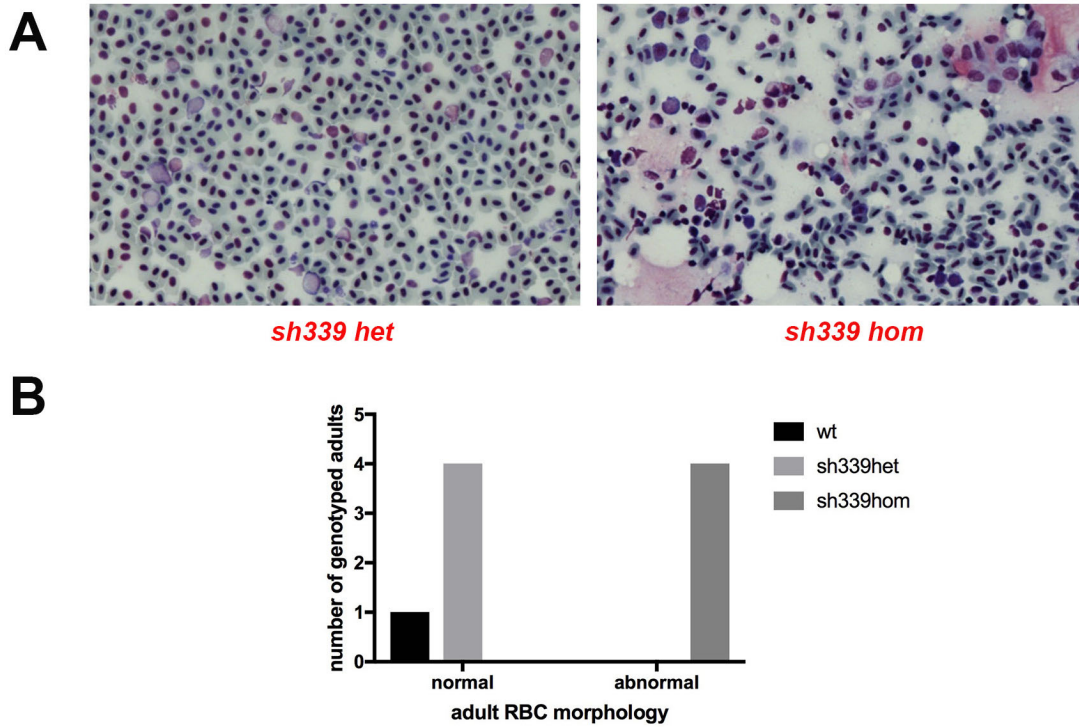

**Figure S9**

**Figure S9: Adult homozygous *gfi1b*<sup>sh339</sup> carriers carry red blood cells with abnormal morphology in their peripheral blood.** (A) Blood smears were taken from adult progeny derived from a *gfi1b*<sup>sh339</sup>*het* incross. Two examples are shown in (A). (B) Genotyping of tissue taken from 5 fish with normal and 4 fish with abnormal adult RBCs was performed. All abnormal blood smears were from *gfi1b*<sup>sh339</sup>*hom* adult fish.

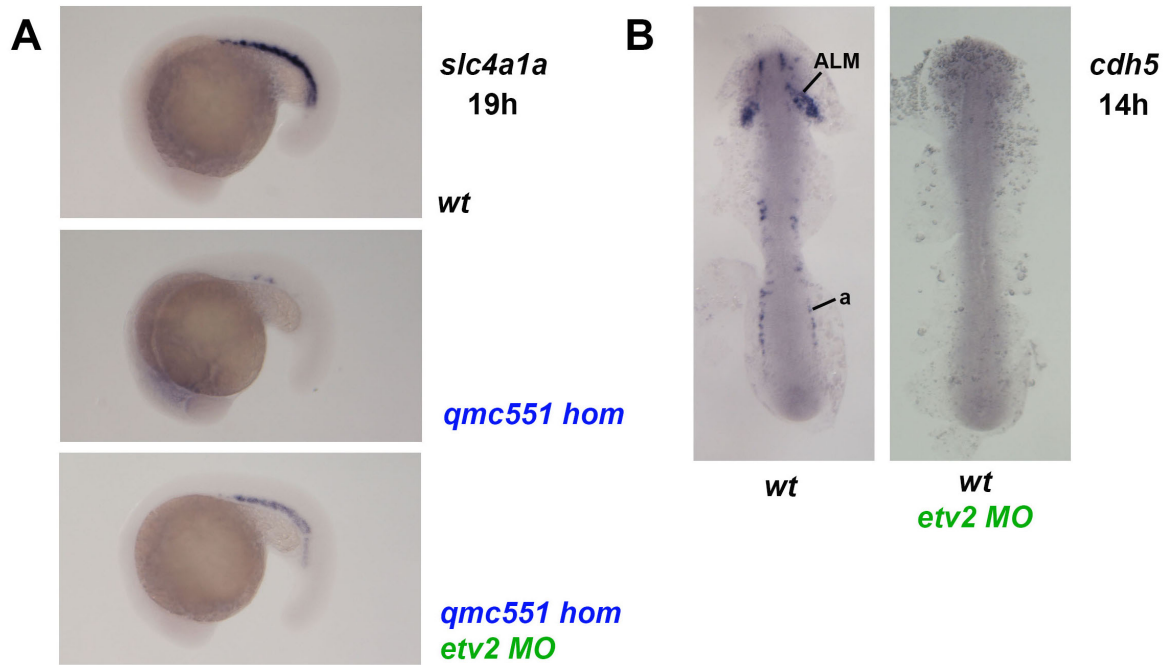

Figure S10

**Figure S10: *Etv2* morpholino-mediated suppression of endothelial gene expression only partially rescues the level of *slc4a1a* expression in prRBCs of *Gfi1aa*-depleted embryos.** 10 ng of an *etv2* 5'UTR MO were injected at the 2-4 cell stage embryos. Embryos in (A) were either *wt* or derived from an incross of *gfi1aa*<sup>*qmc551*</sup> homozygous fish. Embryos in (B) were *wt*. **(A)** *slc4a1a* WISH experiment. 15 *wt*, 21 *gfi1aa* mutant and 20 *gfi1aa* mutant *etv2* morphant embryos were collected at 19 hpf and stained in a WISH experiment with an *slc4a1a* probe. Of the 14 *gfi1aa* mutant embryos that we could accurately stage-match with *gfi1aa* mutant *etv2* morphant embryos, 12 displayed weaker levels of *slc4a1a* expression than the corresponding *gfi1aa* mutant *etv2* morphants while 2 showed similar expression levels. **(B)** *cdh5* WISH experiment. 13 uninjected *wt* embryos and 20 *wt* embryos injected with the *etv2* morpholino were collected at 14 hpf and stained by WISH. While all of the *wt* embryos displayed *cdh5* expression in angioblasts derived from the anterior lateral mesoderm (ALM) and in arterial angioblasts in the posterior lateral mesoderm (a), no *cdh5* expression was detectable in any of the 20 *etv2*-morphant embryos. Embryos in (B) were flat-mounted. Embryos are shown with anterior up. The *cdh5* WISH experiments gives an indication of the efficiency of the morpholino injection. Please note that the *etv2* morpholino also caused a complete loss of *cdh5* expression in the 20 *qmc551* homozygous embryos shown in Figure 5E. In (A) and (B) representative embryos are shown.
